# Supplementary material for: Loss of the Metalloprotease ADAM9 Leads to Cone-Rod Dystrophy in Humans and Retinal Degeneration in Mice
Source: PubMed Central journal article supplement (PMC2681008; doi:10.1016/j.ajhg.2009.04.005), 2009-05-15
Supplement: mmc1.pdf [file mmc1.pdf]

## **Supplemental Data**

### **Loss of the Metalloprotease ADAM9 Leads to Cone-Rod Dystrophy in Humans and Retinal Degeneration in Mice**

David A. Parry, Carmel Toomes, Lina Bida, Michael Danciger, Katherine V. Towns, Martin McKibbin, Samuel G. Jacobson, Clare V. Logan, Manir Ali, Jacquelyn Bond, Rebecca Chance, Steven Swendeman, Lauren L. Daniele, Kelly Springell, Matthew Adams, Colin A. Johnson, Adam P. Booth, Hussain Jafri, Yasmin Rashid, Eyal Banin, Tim M. Strom, Debora B. Farber, Dror Sharon, Carl P. Blobel, Edward N. Pugh Jr., Eric A. Pierce, and Chris F. Inglehearn

**Table S1. Autozygosity mapping of SNPs and microsatellite markers in the CORD9 region.**

SNPs and microsatellites were analyzed for homozygosity in 2 affected members of the Brazilian CORD9 family, indicated by arrows in Figure 2C. Where possible alleles are given, and where alleles differ between genotyped individuals the alleles from the left sibship are given first. The size of putative homozygous regions are shown as the distance between heterozygous markers. The 2.95 Mb refined CORD9 region is highlighted in green containing 82 homozygous markers, including 5 highly polymorphic microsatellites, at an average density of 1 every 0.034 Mb.

| SNP/Microsatellite ID | Position (bp)   | Genotype     | Distance Between Heterozygous Markers (bp) | Alleles           |
|-----------------------|-----------------|--------------|--------------------------------------------|-------------------|
| <b>D8S1048</b>        | 26867404        | Heterozygous | -                                          | 202/210 : 202/206 |
| <b>D8S1820</b>        | 28053266        | Heterozygous | 1185862                                    | 113/117 : 113/105 |
| <b>D8S1809</b>        | 28247294        | Heterozygous | 194028                                     | 161/161 : 161/172 |
| rs924184              | 28352090        | Heterozygous | 104796                                     | T/T : C/T         |
| rs352226              | 28465958        | Heterozygous | 113868                                     | A/G : A/A         |
| rs893307              | 28560267        | Homozygous   |                                            | G/G               |
| rs743673              | 28687510        | Homozygous   |                                            | C/C               |
| <b>rs1113990</b>      | <b>28758718</b> | Heterozygous | <b>292760</b>                              | <b>C/G</b>        |
| rs2137473             | 28902480        | Homozygous   |                                            | C/C               |
| rs6420164             | 29001999        | Homozygous   |                                            | C/C               |
| rs1463363             | 29105837        | Homozygous   |                                            | T/T               |
| <b>rs559132</b>       | <b>29200165</b> | Heterozygous | <b>441447</b>                              | <b>A/G</b>        |
| rs7341661             | 29250497        | Homozygous   |                                            |                   |
| rs2341674             | 29254175        | Homozygous   |                                            | C/C               |
| rs4732927             | 29259703        | Homozygous   |                                            | T/T               |
| rs4732952             | 29379234        | Homozygous   |                                            | T/T               |
| rs10089171            | 29457959        | Homozygous   |                                            | A/A               |
| rs7012771             | 29487626        | Homozygous   |                                            | G/G               |
| rs4443701             | 29496754        | Homozygous   |                                            | G/G               |
| rs6558129             | 29525525        | Homozygous   |                                            | C/C               |
| rs4732980             | 29529350        | Homozygous   |                                            | G/G               |
| rs4732986             | 29541846        | Homozygous   |                                            | C/C               |
| <b>rs6558134</b>      | <b>29546527</b> | Heterozygous | <b>346362</b>                              | <b>C/T</b>        |
| rs9693716             | 29559782        | Homozygous   |                                            |                   |
| rs7845360             | 29561527        | Homozygous   |                                            | T/T               |
| rs3935963             | 29572447        | Homozygous   |                                            | G/G               |
| rs6558135             | 29577601        | Homozygous   |                                            | C/C               |
| rs12546747            | 29583258        | Homozygous   |                                            | A/A               |
| rs6558139             | 29586398        | Homozygous   |                                            | G/G               |

|                |          |              |        |         |
|----------------|----------|--------------|--------|---------|
| rs7002486      | 29597821 | Heterozygous | 51294  | C/T     |
| rs10095128     | 29602407 | Homozygous   |        | G/G     |
| rs10089914     | 29680336 | Homozygous   |        | C/C     |
| rs7459662      | 29802177 | Homozygous   |        | A/A     |
| rs4464924      | 29806735 | Homozygous   |        | T/T     |
| rs11994715     | 29807931 | Homozygous   |        | T/T     |
| rs7832723      | 29917547 | Homozygous   |        | G/G     |
| rs16916        | 29961444 | Heterozygous | 363623 | A/T     |
| rs10088363     | 30011411 | Homozygous   |        | C/C     |
| rs7829853      | 30143082 | Homozygous   |        | G/G     |
| <b>D8S1223</b> | 30149650 | Homozygous   |        | 127/127 |
| rs3028786      | 30186216 | Homozygous   |        |         |
| rs7001463      | 30286193 | Homozygous   |        |         |
| rs4733476      | 30288664 | Homozygous   |        | T/T     |
| rs4260861      | 30301880 | Homozygous   |        |         |
| rs954003       | 30394679 | Homozygous   |        | T/T     |
| rs4285443      | 30446859 | Heterozygous | 485415 | A/G     |
| <b>D8S339</b>  | 30476813 | Homozygous   |        | 174/174 |
| rs2979510      | 30509747 | Heterozygous | 62888  | A/G     |
| rs716942       | 30573674 | Homozygous   |        |         |
| rs1116003      | 30774905 | Homozygous   |        |         |
| rs2080719      | 30871664 | Homozygous   |        |         |
| <b>D8S1021</b> | 30923457 | Heterozygous | 413710 | ab      |
| rs7006039      | 30935824 | Homozygous   |        |         |
| rs1362911      | 30984486 | Homozygous   |        |         |
| rs1477535      | 31078407 | Heterozygous | 154950 | A/G     |
| rs2019726      | 31087966 | Homozygous   |        |         |
| rs2252480      | 31109652 | Heterozygous | 31245  | C/T     |
| rs3024239      | 31118664 | Heterozygous | 9012   | C/T     |
| rs6468026      | 31194597 | Homozygous   |        | C/C     |
| rs10447952     | 31216808 | Homozygous   |        | A/A     |
| rs7812391      | 31241311 | Heterozygous | 122647 | C/T     |
| rs4609156      | 31253200 | Homozygous   |        | T/T     |
| <b>D8S1770</b> | 31259325 | Homozygous   |        | 260/260 |
| rs4733071      | 31260412 | Homozygous   |        |         |
| <b>D8S1769</b> | 31264876 | Homozygous   |        | 246/246 |
| rs5002658      | 31270556 | Homozygous   |        |         |
| rs1992061      | 31295271 | Homozygous   |        |         |
| rs7460665      | 31316591 | Homozygous   |        |         |
| rs2681603      | 31323014 | Homozygous   |        | T/T     |
| rs10093871     | 31338282 | Homozygous   |        |         |
| rs6468041      | 31354330 | Homozygous   |        | G/G     |
| rs737377       | 31368530 | Homozygous   |        | T/T     |
| rs2575069      | 31374239 | Homozygous   |        | G/G     |

|                |          |              |        |         |
|----------------|----------|--------------|--------|---------|
| rs6996092      | 31427599 | Homozygous   |        |         |
| rs2033671      | 31440415 | Homozygous   |        | G/G     |
| <b>D8S1711</b> | 31443817 | Homozygous   |        | 141/141 |
| rs7828595      | 31452978 | Heterozygous | 211667 | C/T     |
| rs7844630      | 31458798 | Heterozygous | 5820   | A/G     |
| rs7834980      | 31463987 | Homozygous   |        | A/A     |
| rs2681627      | 31469010 | Homozygous   |        | T/T     |
| rs763551       | 31564671 | Heterozygous | 105873 | A/C     |
| rs7002293      | 31721966 | Homozygous   |        | T/T     |
| rs10109763     | 31791935 | Homozygous   |        | T/T     |
| <b>D8S1810</b> | 31811263 | Homozygous   |        | 185/185 |
| rs10503892     | 31824975 | Homozygous   |        | T/T     |
| rs7357490      | 31870435 | Homozygous   |        | C/C     |
| <b>D8S2319</b> | 31934883 | Heterozygous | 370212 | 130/138 |
| <b>D8S1477</b> | 32186709 | Heterozygous | 251826 | 159/167 |
| <b>D8S499</b>  | 32261497 | Heterozygous | 74788  | 149/145 |
| D8S1125        | 32487058 | Homozygous   |        | 232/232 |
| <b>D8S375</b>  | 32577362 | Heterozygous | 315865 | ba      |
| <b>D8S1758</b> | 33172329 | Heterozygous | 594967 | 236/250 |
| <b>D8S283</b>  | 33747507 | Heterozygous | 575178 | 115/119 |
| <b>D8S513</b>  | 33788903 | Heterozygous | 41396  | 202/198 |
| <b>D8S505</b>  | 34570479 | Heterozygous | 781576 | 203/209 |
| <b>D8S1750</b> | 35532837 | Heterozygous | 962358 | 212/219 |
| <b>D8S1121</b> | 35920931 | Heterozygous | 388094 | 114/117 |
| <b>D8S1700</b> | 35921521 | Heterozygous | 590    | 120/122 |
| <b>D8S1803</b> | 36514271 | Heterozygous | 592750 | 280/284 |
| <b>D8S1747</b> | 37112470 | Heterozygous | 598199 | 218/220 |
| rs502356       | 37168224 | Heterozygous | 55754  | A/G     |
| rs374241       | 37273182 | Homozygous   |        |         |
| rs239429       | 37353994 | Heterozygous | 185770 | A/G     |
| rs2541434      | 37382893 | Heterozygous | 28899  | A/G     |
| rs2843797      | 37388099 | Heterozygous | 5206   | C/T     |
| rs2843781      | 37400574 | Heterozygous | 12475  | C/T     |
| rs2541454      | 37405319 | Homozygous   |        | T/T     |
| rs7812562      | 37419329 | Heterozygous | 18755  | C/T     |
| rs7017160      | 37448473 | Heterozygous | 29144  | G/T     |
| rs16886775     | 37450213 | Heterozygous | 1740   | A/C     |
| rs16886778     | 37450348 | Heterozygous | 135    | C/T     |
| rs7001685      | 37452990 | Heterozygous | 2642   | C/T     |
| rs9642773      | 37463440 | Heterozygous | 10450  | C/T     |
| rs10955025     | 37473135 | Heterozygous | 9695   | A/G     |
| rs12543429     | 37550490 | Homozygous   |        | C/C     |
| rs7832424      | 37612663 | Homozygous   |        | A/A     |
| rs7814863      | 37690550 | Homozygous   |        |         |
| rs7005432      | 37767164 | Homozygous   |        | T/T     |
| rs915650       | 37776684 | Homozygous   |        | C/C     |
| rs4976893      | 37780106 | Homozygous   |        | C/C     |

|                   |          |            |  |         |
|-------------------|----------|------------|--|---------|
| <b>D8S1722</b>    | 37780634 | Homozygous |  | 217/217 |
| rs7813990         | 37790298 | Homozygous |  | T/T     |
| rs6998793         | 37816032 | Homozygous |  | T/T     |
| rs12541064        | 37825425 | Homozygous |  | A/A     |
| rs7341564         | 37849614 | Homozygous |  | T/T     |
| rs10955035        | 37857774 | Homozygous |  | G/G     |
| rs7016233         | 37858061 | Homozygous |  | A/A     |
| rs7812866         | 37869447 | Homozygous |  | C/C     |
| rs7833285         | 38119476 | Homozygous |  |         |
| rs2843745         | 38143780 | Homozygous |  | T/T     |
| rs12682626        | 38165926 | Homozygous |  | A/A     |
| rs7836805         | 38182392 | Homozygous |  | C/C     |
| <b>D8S1791</b>    | 38273218 | Homozygous |  | 239/239 |
| rs7835269         | 38346917 | Homozygous |  |         |
| rs6987534         | 38418872 | Homozygous |  | G/G     |
| <b>D8S1821</b>    | 38470657 | Homozygous |  | 150/150 |
| rs7845393         | 38478625 | Homozygous |  | C/C     |
| rs1541897         | 38482629 | Homozygous |  | A/A     |
| rs2461327         | 38493081 | Homozygous |  | T/T     |
| rs2445026         | 38528479 | Homozygous |  | T/T     |
| rs7817828         | 38549391 | Homozygous |  | G/G     |
| rs1000236         | 38593641 | Homozygous |  | A/A     |
| <b>GATA101H09</b> | 38759531 | Homozygous |  | 287/287 |
| rs6997835         | 38776852 | Homozygous |  | T/T     |
| rs7818605         | 38783331 | Homozygous |  | A/A     |
| rs2037205         | 38803584 | Homozygous |  | A/A     |
| rs7005388         | 38806387 | Homozygous |  | C/C     |
| rs869471          | 38813540 | Homozygous |  | C/C     |
| rs7009521         | 38820486 | Homozygous |  | G/G     |
| rs4577922         | 38828559 | Homozygous |  |         |
| rs3847141         | 38873687 | Homozygous |  | A/A     |
| rs4301415         | 38943408 | Homozygous |  |         |
| rs10809000        | 39006349 | Homozygous |  | G/G     |
| rs7818363         | 39017964 | Homozygous |  | C/C     |
| rs7015505         | 39021034 | Homozygous |  | T/T     |
| rs4075849         | 39053740 | Homozygous |  | C/C     |
| rs6474525         | 39056144 | Homozygous |  | T/T     |
| rs7840009         | 39131609 | Homozygous |  | A/A     |
| rs10094307        | 39188310 | Homozygous |  | T/T     |
| rs4551318         | 39261707 | Homozygous |  |         |
| rs7006167         | 39302883 | Homozygous |  | G/G     |
| rs6474131         | 39344125 | Homozygous |  | C/C     |
| rs6474159         | 39577556 | Homozygous |  |         |

|                |          |              |          |         |
|----------------|----------|--------------|----------|---------|
| rs11985352     | 39586481 | Homozygous   |          | A/A     |
| rs6983284      | 39642225 | Homozygous   |          | G/G     |
| rs10103827     | 39647959 | Homozygous   |          | A/A     |
| rs6474166      | 39659073 | Homozygous   |          | G/G     |
| rs1901388      | 39672418 | Homozygous   |          | T/T     |
| rs9657175      | 39692225 | Homozygous   |          | A/A     |
| rs6474169      | 39697120 | Homozygous   |          | T/T     |
| rs10087294     | 39738317 | Homozygous   |          | C/C     |
| rs7835497      | 39741907 | Homozygous   |          | T/T     |
| rs3853758      | 39744837 | Homozygous   |          | G/G     |
| rs2290301      | 39753124 | Homozygous   |          | T/T     |
| rs13253873     | 39758568 | Homozygous   |          | G/G     |
| rs7822312      | 39764090 | Homozygous   |          | C/C     |
| rs2100309      | 39766809 | Homozygous   |          | A/A     |
| rs7812966      | 39769578 | Homozygous   |          |         |
| rs1451741      | 39770097 | Homozygous   |          | C/C     |
| rs7821582      | 39781596 | Homozygous   |          | C/C     |
| rs6474177      | 39783853 | Homozygous   |          |         |
| rs7832788      | 39837739 | Homozygous   |          | A/A     |
| rs3808606      | 39888532 | Homozygous   |          | T/T     |
| rs7820268      | 39896686 | Homozygous   |          | C/C     |
| rs3739319      | 39904478 | Homozygous   |          | A/A     |
| rs6992375      | 39909565 | Homozygous   |          | C/C     |
| rs11777027     | 39916628 | Homozygous   |          | C/C     |
| rs4736969      | 39984685 | Homozygous   |          | A/A     |
| <b>D8S255</b>  | 40004275 | Homozygous   |          | 117/117 |
| rs1383603      | 40043175 | Homozygous   |          | A/A     |
| rs2955862      | 40063231 | Homozygous   |          | G/G     |
| rs10199        | 40131220 | Homozygous   |          | G/G     |
| rs6474228      | 40143763 | Homozygous   |          | G/G     |
| rs724323       | 40158021 | Homozygous   |          | A/A     |
| rs726922       | 40204591 | Homozygous   |          | A/A     |
| rs6984370      | 40327248 | Homozygous   |          | G/G     |
| rs725401       | 40420045 | Heterozygous | 2946910  | C/T     |
| <b>D8S1817</b> | 40567202 | Heterozygous | 147157   | 176/168 |
| <b>D8S1104</b> | 40762949 | Heterozygous | 195747   | 133/137 |
| <b>D8S532</b>  | 40907529 | Heterozygous | 144580   | 243/245 |
| <b>D8S589</b>  | 51088398 | Heterozygous | 10180869 | 145/141 |

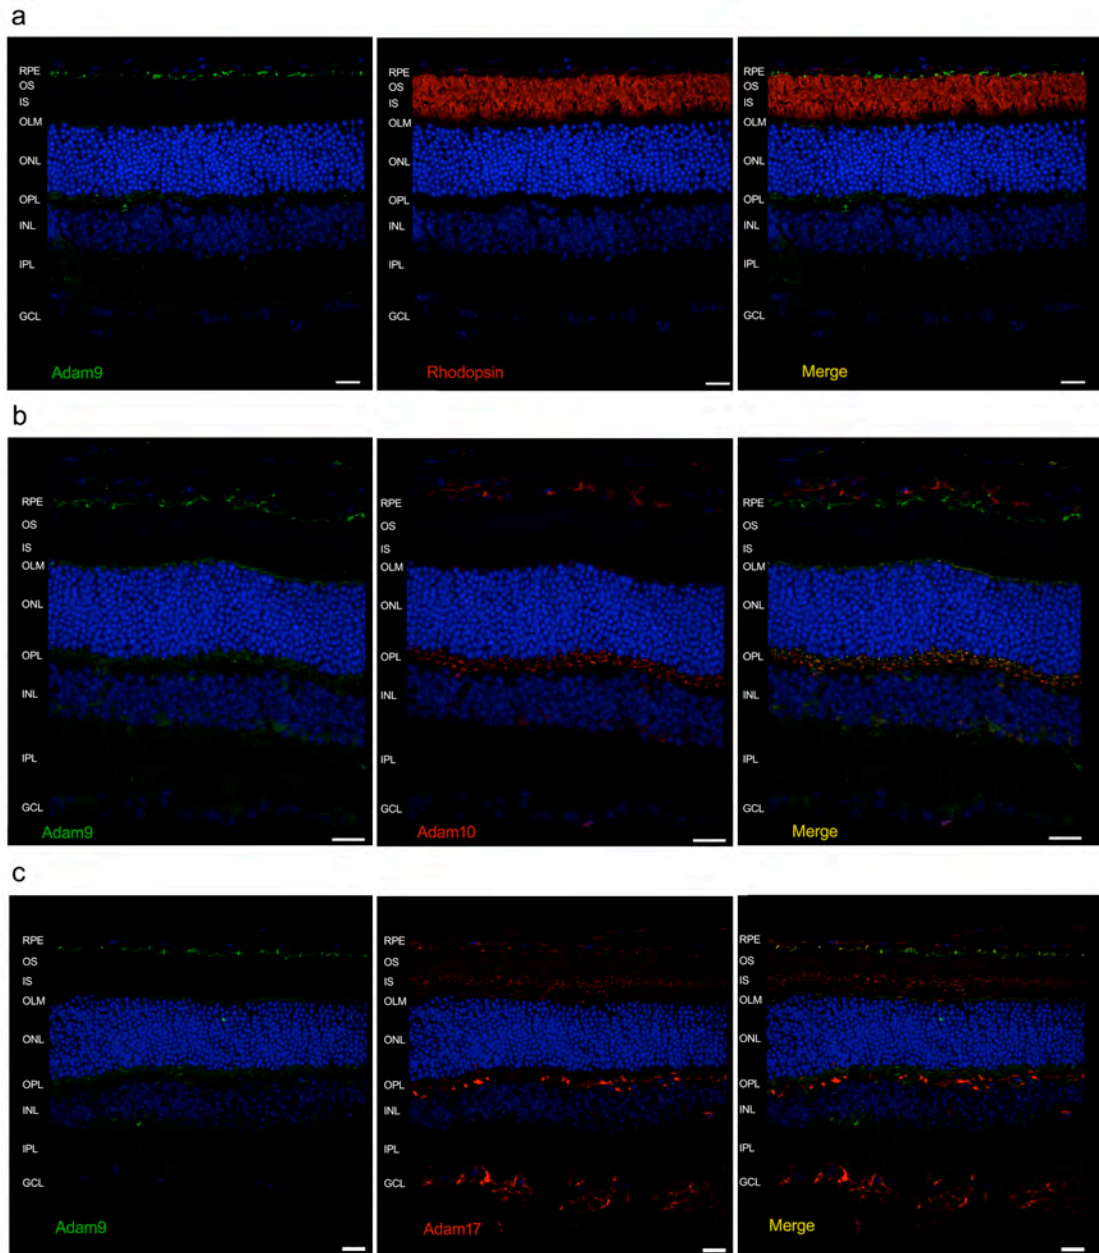

**Figure S1. Adam9 staining of mouse retina.**

Mouse eye cryosections were prepared by standard methods and incubated with a goat polyclonal antibody to Adam9 (Santa Cruz Biotechnology inc., SC23290) and co-stained with antibodies to (a) Rhodopsin (Sigma, R9153), (b) Adam10 (Chemicon International, AB 19026) or (c) Adam17 (R & D Systems, MAB9302). Bound Adam9 primary antibody was detected with Alexa Fluor 488 conjugated secondary antibody. Rhodopsin, Adam10 and Adam17 antibodies were detected with Alexa Fluor 594 conjugated secondary antibody. DAPI staining of nuclei is shown in blue. Adam9 immunoreactivity shows brightest staining at the RPE - POS boundary, but cross-reactivity was observed in some *Adam9*<sup>-/-</sup> retinal sections (not shown) so these data should be interpreted with caution. Adam9,

Adam10 and Adam17 show distinct staining patterns but some Adam17 staining is also observed at the RPE – POS interface. Adam9 immunoreactivity in the *Adam9*<sup>-/-</sup> retina could be due to cross-reactivity of the antibody with other Adam family members at this location. RPE, retinal pigment epithelium; OS, photoreceptor outer segments; IS, photoreceptor inner segments; OLM, outer limiting membrane; ONL, outer nuclear layer; OPL, outer plexiform layer; INL, inner nuclear layer; IPL, inner plexiform layer; GCL, ganglion cell layer. Scale bars: 20 μm.
